# Supplementary material for: Edge functionalized germanene nanoribbons: impact on electronic and magnetic properties
Source: Royal Society of Chemistry journal article supplement (doi:10.1039/c6ra25083a), 2017-01-01
Supplement: c6ra25083a1.pdf [file c6ra25083a1.pdf]

## Edge functionalized germanene nanoribbons: Impact on electronic and magnetic properties

Received 00th January 20xx,  
Accepted 00th January 20xx

M. M. Monshi,<sup>a</sup> S. M. Aghaei,<sup>a</sup> and I. Calizo<sup>a, b</sup>

DOI: 10.1039/x0xx00000x

www.rsc.org/

### Electronic Supplementary Information

Table S1 Formation energy  $E_f$  (eV), band gap  $E_g$  (eV), magnetic state, the energy difference between the FM and AFM state  $\Delta E_{FM-AFM}$  (eV), and spin-polarized band gap (eV) for N- and B-doped armchair edge GeNRs functionalized with hydrogen and fluorine.

| Edge Type | Edge Atom | Dopant | $E_f$ (eV/A) | Band gap (eV) | Magnetic State | Magnetic Edge State |                                      |
|-----------|-----------|--------|--------------|---------------|----------------|---------------------|--------------------------------------|
|           |           |        |              |               |                | $\Delta E$ (meV)    | Band gap (eV)                        |
| $a_{11}$  | H         | N      | -0.522       | 0.0           | FM             | -0.08               | -                                    |
|           | H         | B      | -4.163       | 0.0           | NM             | -                   | -                                    |
|           | F         | N      | +2.654       | 0.0           | AFM-S          | +0.01               | Up (0.1362) (in) – Down (0.4392) (d) |
|           | F         | B      | -4.737       | 0.0           | FM-S           | -0.01               | Up (0.4254) (d) – Down (0.3932) (d)  |
| $a_{22}$  | H         | N      | +0.142       | 0.00          | NM             | -                   | -                                    |
|           | H         | B      | -4.663       | 0.00          | NM             | -                   | -                                    |
|           | F         | N      | -0.473       | 0.00          | NM             | -                   | -                                    |
|           | F         | B      | -4.043       | 0.389 (d)     | NM             | -                   | -                                    |

Table S2 Edge formation energy  $E_{edge}$  (eV), band gap  $E_g$  (eV), magnetic state, the energy difference between the FM and AFM state  $\Delta E_{FM-AFM}$  (eV), total magnetic moment  $M_{total}$  ( $\mu_B$ ), and spin-polarized band gap (eV) for  $z_{11}$  and  $z_{22}$  zigzag edge GeNRs functionalized with hydrogen and halogens.

| Edge Type | Edge Atom | $E_{edge}$ (eV/Å) | Band Gap (eV) | Magnetic State | Magnetic Edge State |               |                    |
|-----------|-----------|-------------------|---------------|----------------|---------------------|---------------|--------------------|
|           |           |                   |               |                | $\Delta E$ (meV)    | Band Gap (eV) | Moment ( $\mu_B$ ) |
| $z_{11}$  | Bare      | +0.243            | 0.00          | AFM-S          | +14.98              | 0.3274(d)     | -                  |
|           | H         | +0.127            | 0.00          | AFM-S          | +11.36              | 0.2626 (d)    | 0.00               |
|           | F         | -0.730            | 0.00          | AFM-S          | +7.73               | 0.2325 (d)    | 0.00               |
|           | Cl        | -0.351            | 0.00          | AFM-S          | +2.49               | 0.2226 (d)    | 0.00               |
| $z_{22}$  | Bare      | +0.243            | 0.00          | AFM-S          | -                   | -             | -                  |
|           | H         | +0.107            | 0.00          | AFM-S          | +0.023              | 0.2833 (in)   | 0.00               |
|           | F         | -1.665            | 0.00          | NM             | 0.0                 | 0.00          | 0.00               |
|           | Cl        | -0.843            | 0.00          | NM             | 0.0                 | 0.00          | 0.00               |

$a$ : armchair,  $z$ : zigzag, subscripts: the number of functional atoms attached to Ge edge atom, NM: non-magnetic, FM: ferromagnetic, AFM: antiferromagnetic, S: semiconductor, d: direct band gap, in: indirect band gap,  $\Delta E$ :  $E_{FM}-E_{AFM}$

<sup>a</sup> Quantum Electronic Structures Technology Lab, Department of Electrical and Computer Engineering, Florida International University, Miami, Florida 33174, United States

<sup>b</sup> Department of Mechanical and Materials Engineering, Florida International University, Miami, Florida 33174, United States

Table S3 Edge formation energy  $E_{\text{edge}}$  (eV), band gap  $E_g$  (eV), magnetic state, the energy difference between the FM and AFM state  $\Delta E_{\text{FM-AFM}}$  (eV), and spin-polarized band gap (eV) for different N- and B-doped zigzag edge GeNRs with hydrogen and fluorine.

| Edge Type | Edge Atom | Dopant | $E_{\text{edge}}$<br>(eV/Å) | Band gap<br>(eV) | Magnetic State | Magnetic Edge State |                                     |
|-----------|-----------|--------|-----------------------------|------------------|----------------|---------------------|-------------------------------------|
|           |           |        |                             |                  |                | $\Delta E$ (meV)    | Band gap (eV)                       |
| $Z_{11}$  | H         | B      | -4.33                       | 0.00             | AFM-S          |                     | Up (0.314) (d) – Down (0)           |
|           | H         | N      | -0.625                      | 0.00             | AFM-S          |                     | Up (0) (d) – Down (0.3329) (d)      |
|           | F         | B      | -4.646                      | 0.00             | AFM-S          |                     | Up (0) (d) – Down (0.1461) (in)     |
|           | F         | N      | +2.59                       | 0.00             | AFM-S          |                     | Up (0.3081) (d) – Down (0.1318) (d) |
| $Z_{22}$  | H         | B      | -3.954                      | 0.00             | AFM-S          |                     | Up (0.3505) (d) – Down (0) (in)     |
|           | H         | N      | -0.02                       | 0.00             | AFM-S          |                     | Up (0.3379) (d) – Down (0.1189) (d) |
|           | F         | B      | -4.62                       | 0.00             | FM-S           |                     | Up (0.2071) (d) – Down (0.0988) (d) |
|           | F         | N      | -1.05                       | 0.00             | AFM-S          |                     | 0.0                                 |

$a$ : armchair,  $z$ : zigzag, subscripts: the number of fictional atoms attached to Ge edge atom, NM: non-magnetic, FM: ferromagnetic, AFM: antiferromagnetic, S: semiconductor, d: direct band gap, in: indirect band gap,  $\Delta E$ :  $E_{\text{FM}} - E_{\text{AFM}}$
